# Supplementary material
Source: publisher site journal article supplement (https://www.spandidos-publications.com/2593/downloadSupplementary)

Figure S1. (A) HCT116 and (B) LOVO cell apoptosis as determined via flow cytometry. si, small interfering RNA; NC, negative control.

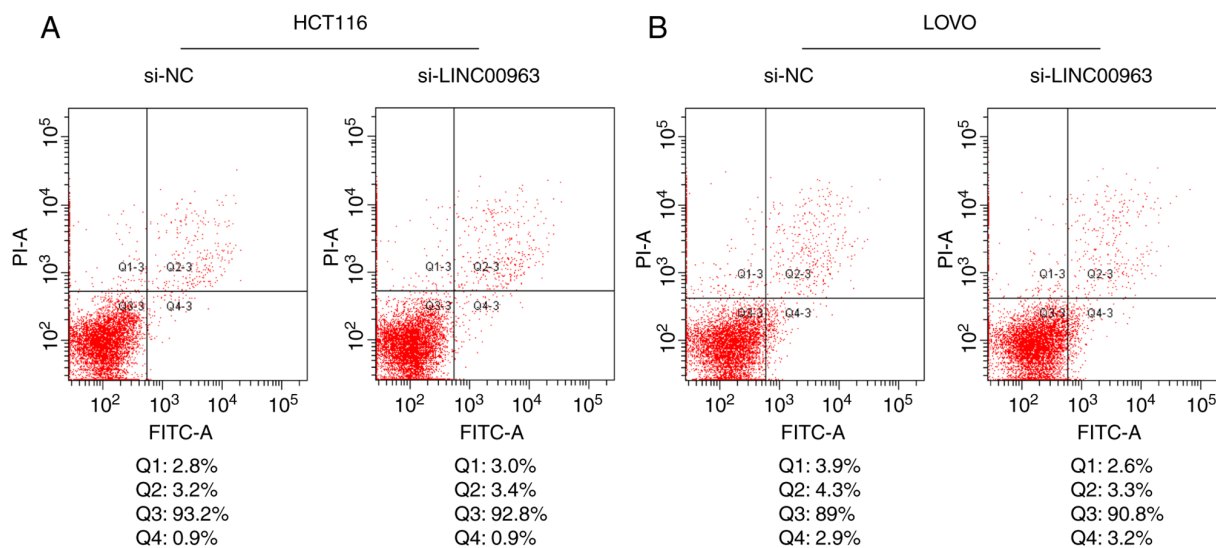

Figure S2. Transfection efficiency of miR-10b mimics and miR-10b inhibitors. miR-10b expression levels in HCT116 and LOVO cells following transfection with (A) miR-10b mimics and (B) miR-10b inhibitors. Data are presented as mean  $\pm$  standard deviation. \*\*P<0.01. miR, microRNA; NC, negative control; in, inhibitors.

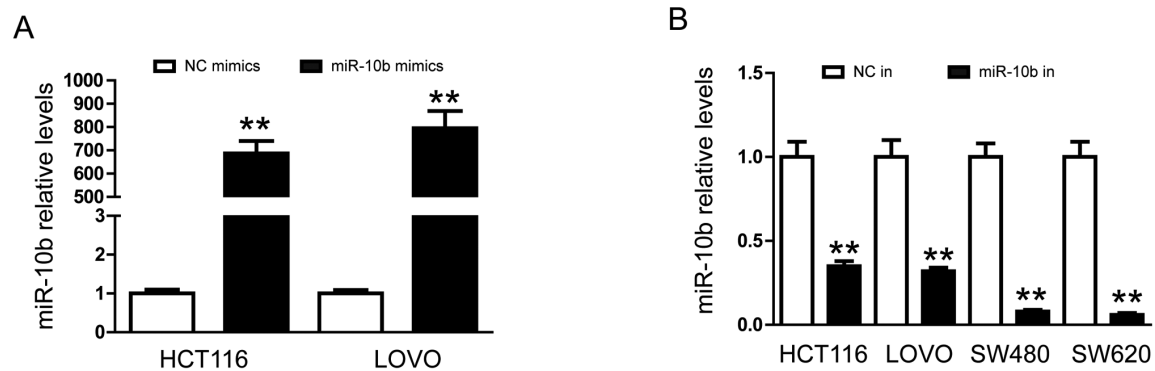

Figure S3. (A) LINC00963 expression levels following transfection with miR-10b mimics in HCT116 and LOVO cells. (B) Transfection efficiency detection of overexpression of LINC00963 in HCT116, LOVO, SW480 and SW620 cells. (C) miR-10b expression levels following transfection with OV-LINC00963 in HCT116, LOVO, SW480 and SW620 cells. (D) miR-10b expression levels following transfection with si-LINC00963 in HCT116 and LOVO cells. (E) FGF13 expression levels following transfection with miR-10b mimics in HCT116 and LOVO cells. Data are presented as mean  $\pm$  standard deviation. \* $P$ <0.05 and \*\* $P$ <0.01. LINC00963, long intergenic non-protein coding RNA 963; miR, microRNA; FGF13, fibroblast growth factor 13; Ctrl, control; OV, overexpression vector; si, small interfering RNA.

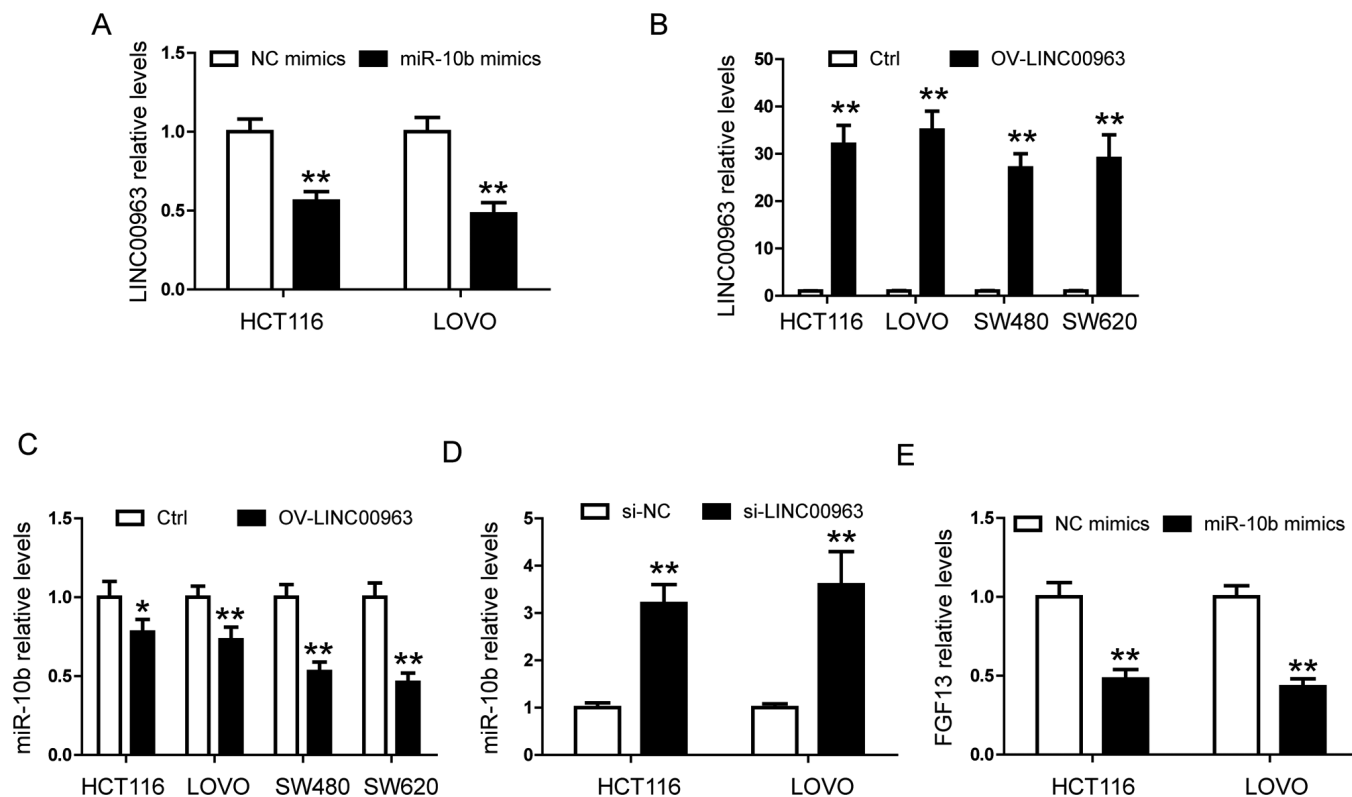

Supplement: Supplementary file 1 [file downloadSupplementary]
